# Supplementary material for: A nanoparticle reinforced microporous methacrylated silk fibroin hydrogel to promote bone regeneration
Source: Royal Society of Chemistry journal article supplement (doi:10.1039/d3bm01901b), 2024-01-01
Supplement: d3bm01901b1.pdf [file d3bm01901b1.pdf]

Table 1. Primers for RT-PCR Analysis.

| Gene   | Forward premier          | Reverse premier          |
|--------|--------------------------|--------------------------|
| Col-I  | AGAGGCATAAAGGGTCATCGTG   | AGACCGTTGAGTCCATCTTTGC   |
| Runx-2 | TACCCAGGCGTATTTTCAGATGAT | TGTAAGTGAAGGTGGCTGGATAGT |
| OCN    | TGACAAAGCCTTCATGTCCAA    | CTCCAAGTCCATTGTTGAGGTAG  |
| GAPDH  | CTGGAGAAACCTGCCAAGTATG   | GGTGGGAAGAATGGGAGTTGCT   |

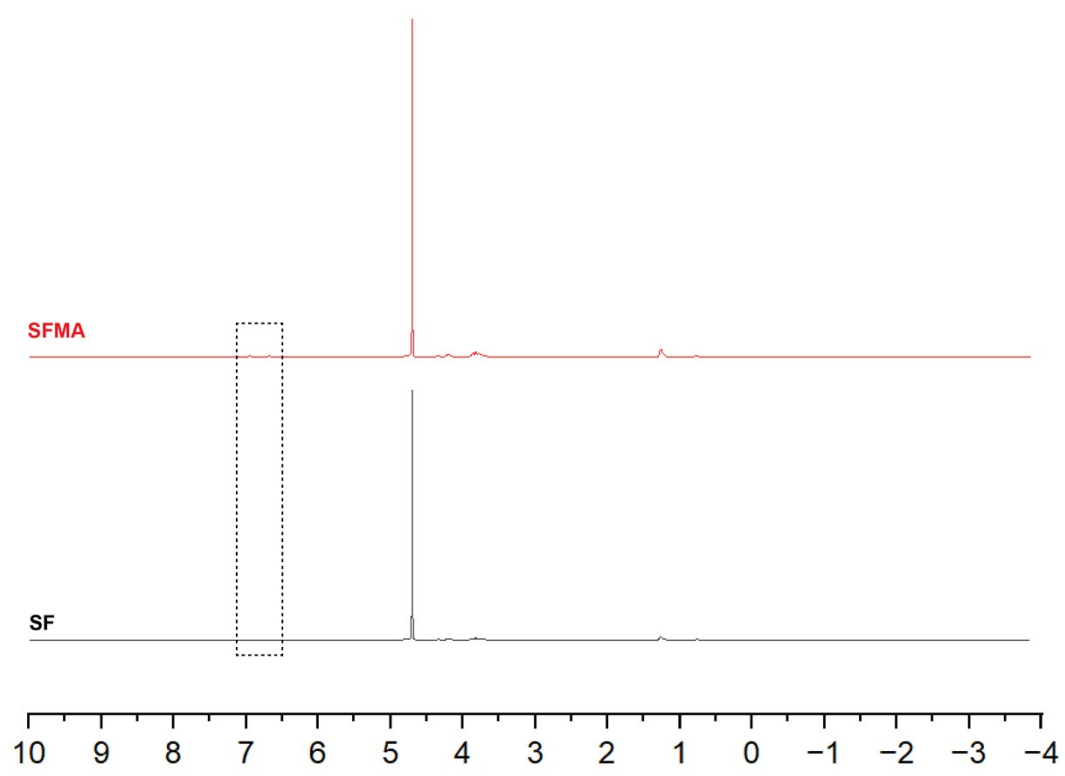

Fig. s1 <sup>1</sup>H-NMR spectra of SF and SFMA.

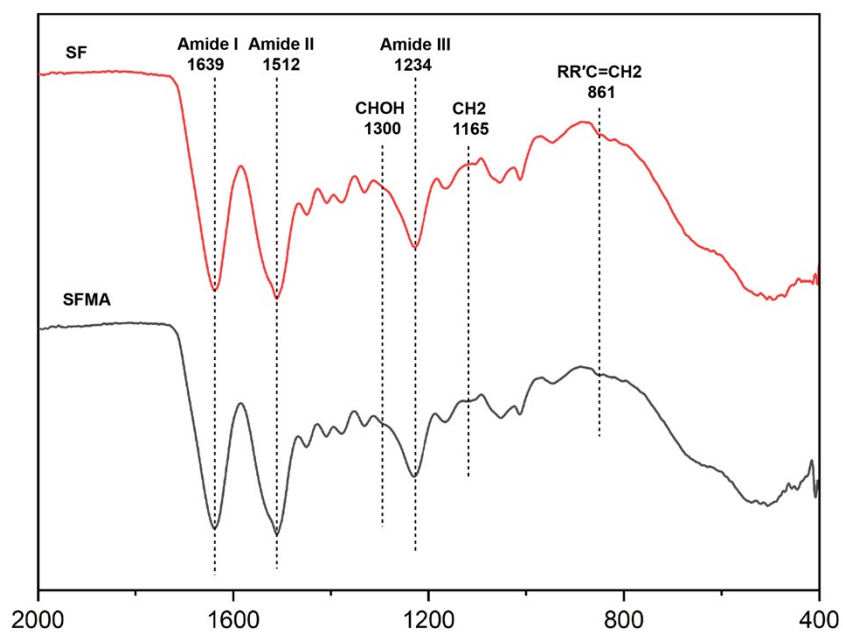

Fig. s2 FTIR spectra of SF and SFMA
